# Supplementary material for: Sign inversion of magnetic circularly polarized luminescence in Iridium(iii) complexes bearing achiral ligands
Source: Royal Society of Chemistry journal article supplement (doi:10.1039/d0cp05775d), 2021-01-01
Supplement: d0cp05775d1.pdf [file d0cp05775d1.pdf]

**Electronic Supporting Information (ESI) for**

**Sign inversion of magnetic circularly polarized luminescence  
in Iridium(III) complexes bearing achiral ligands**

Kana Matsudaira,<sup>a</sup> Atsushi Izumoto,<sup>a</sup> Yuki Mimura,<sup>a</sup> Yoshiro Kondo,<sup>b</sup> Satoko Suzuki,<sup>b</sup>

Shigeyuki Yagi,<sup>c</sup> Michiya Fujiki,<sup>d</sup> and Yoshitane Imai<sup>a\*</sup>

<sup>a</sup> Department of Applied Chemistry, Faculty of Science and Engineering, Kindai University, 3-4-1 Kowakae, Higashi-Osaka, Osaka 577-8502, Japan.

<sup>b</sup> JASCO Corporation, 2967-5 Ishikawa, Hachioji, Tokyo 192-8537, Japan.

<sup>c</sup> Department of Applied Chemistry, Graduate School of Engineering, Osaka Prefecture University, 1-1 Gakuen-cho, Naka-ku, Sakai, Osaka 599-8531, Japan.

<sup>d</sup> Graduate School of Materials Science, Nara Institute of Science and Technology, 8916-5 Takayama, Ikoma, Nara 630-0192, Japan.

Correspondence to: (Y.I.) [y-imai@apch.kindai.ac.jp](mailto:y-imai@apch.kindai.ac.jp).

(a)

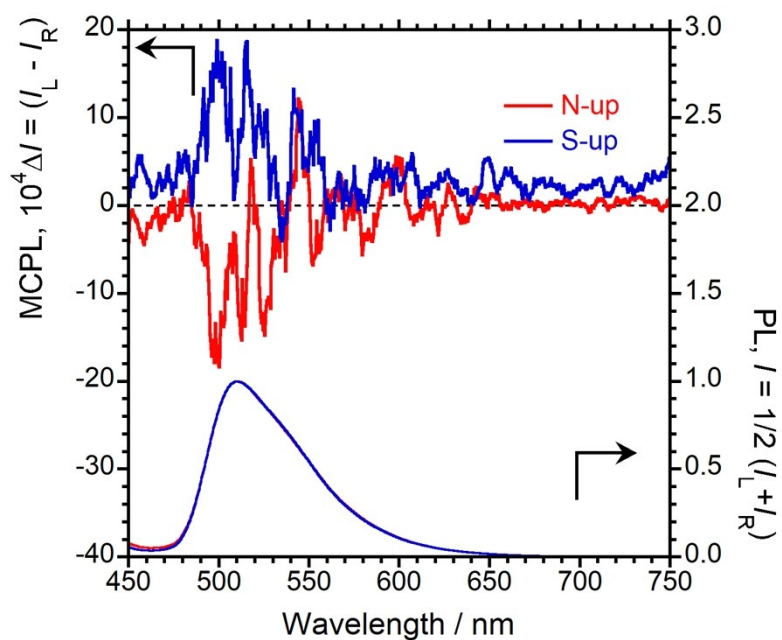

(b)

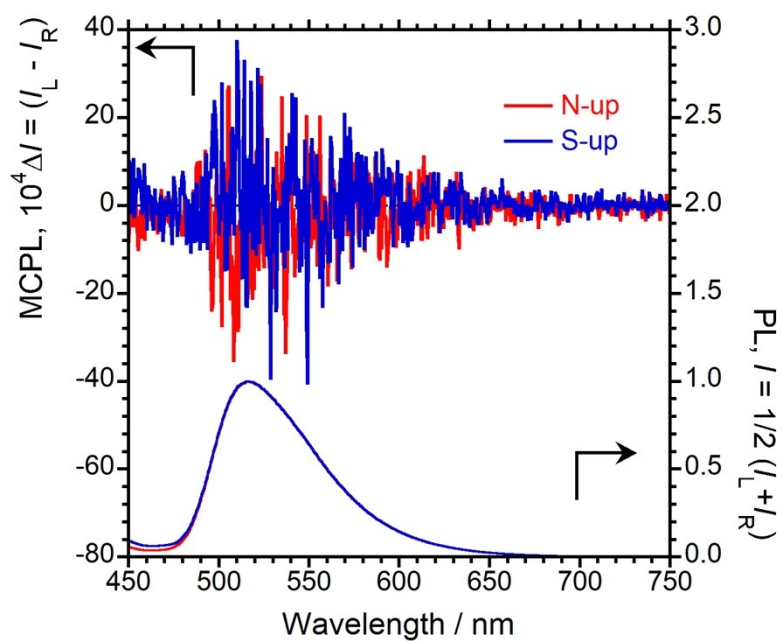

**Fig. S1.** MCPL (upper panel) and PL (lower panel) spectra of Ir(ppy)<sub>3</sub> in N-up (red lines) and S-up (blue lines) magnetic fields in (a) CH<sub>2</sub>Cl<sub>2</sub> ( $1.0 \times 10^{-4}$  M), and (b) DMSO ( $1.0 \times 10^{-4}$  M).

(a)

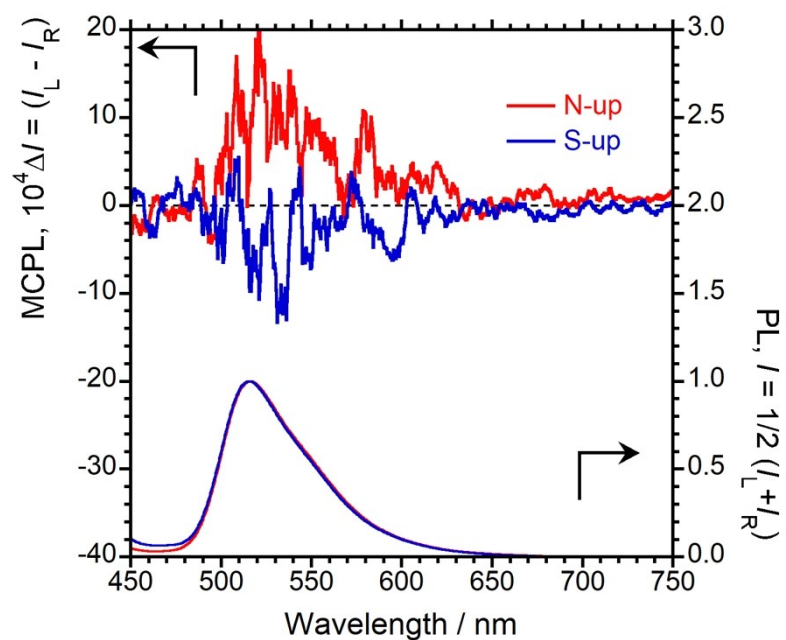

(b)

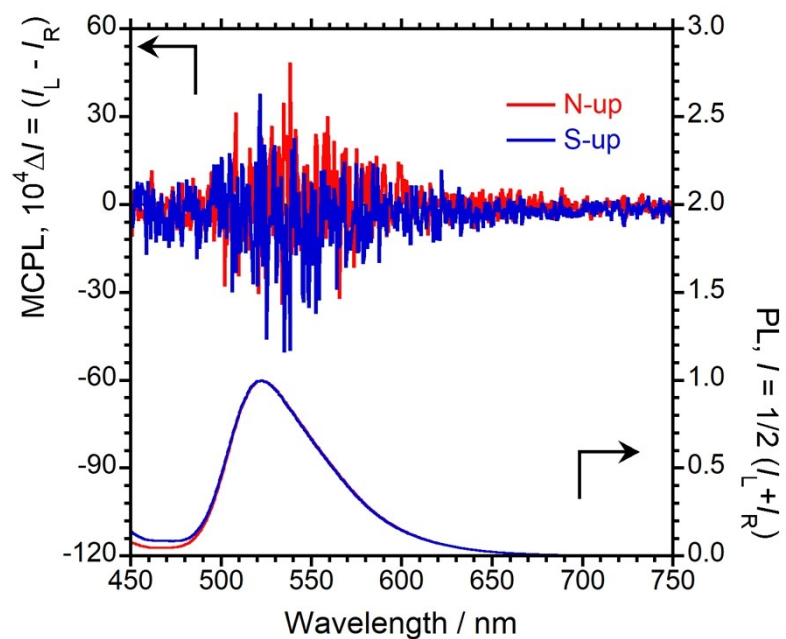

**Fig. S2.** MCPL (upper panel) and PL (lower panel) spectra of Ir(ppy)<sub>2</sub>(acac) in N-up (red lines) and S-up (blue lines) magnetic fields in (a) CH<sub>2</sub>Cl<sub>2</sub> (1.0 × 10<sup>-4</sup> M), and (b) DMSO (1.0 × 10<sup>-4</sup> M).
